# Supplementary material
Source: Elsevier journal article supplement (https://www.sciencedirect.com/science/article/pii/S0870902512000314)
Supplement: mmc1 [file S0870902512000314:mmc1.doc]

### Anexo 1

### Questionário de identificação de sintomas de lesões músculo-esqueléticas ligadas ao trabalho (LMELT) em Enfermeira(o)s

**Estudo Nacional de caracterização da sintomatologia músculo-esquelética ligada ao trabalho em Enfermeira(o)s.**

**Este questionário pretende conhecer aspectos da sua saúde, hábitos e actividade profissional. O resultado é para utilização exclusiva no contexto da vigilância da saúde, estando assegurada a confidencialidade das respostas e a não utilização para quaisquer outros fins**.

**POR FAVOR, seja o mais preciso possível nas suas respostas.**

A sua contribuição é indispensável. O questionário depende da sua cooperação e estimamos que deverá ocupar apenas cerca de 10 minutos.

**As suas respostas são anónimas e totalmente confidenciais.**

**Regras de preenchimento:**

Seleccione a resposta correspondente à sua opção ou identifique o número correspondente à sua escolha na chave de respostas múltiplas.

Complete as suas respostas quando existir essa oportunidade.

**MUITO OBRIGADO PELO SEU CONTRIBUTO**

**A – Caracterização sócio-demográfica**

1. Local de trabalho: Norte Centro LVT Alentejo Algarve Ilhas

| **Dia** | **Mês** | **Ano** |
| --- | --- | --- |
|  |  |  |

2. Hospital EPE Hospital SPA (Lista de hospitais ao click)

ARS (lista ao click) Outro ____________________

3. Serviço (lista de serviços hospitalares + Cuidados de Saúde Primários; CS Continuados; CS Paliativos; INEM; Enfermagem do Trabalho) Outro _____________

4. Categoria profissional (lista de categorias: Dec. Lei da Nova Carreira e Lista antiga)

5. Tipo de Horário: Fixo Turnos

6. Género: Feminino Masculino

7. Ano de nascimento:____________ 4. Peso _________ Kg 5.Altura _______ m

8. Membro superior dominante:

Dextro Esquerdino / Canhoto Ambidextro

9. Há quanto tempo é Enfermeira(o)? __________ anos _________ meses

10. Em média, quantas horas trabalha por semana? ________ horas

11.Tem segundo emprego?NÃO SIM

11.1. A tempo: Completo (horas)_______ Parcial (horas)________

11.2. Hospital USF Clínica Privada

11.3. Outro_____________________________________________

**B – Caracterização da sintomatologia ligada ao trabalho**

Preencha a tabela seguinte, assinalando com uma cruz o quadrado correspondente ao seu estado de fadiga, desconforto ou dor, em função dos segmentos corporais considerados. **No caso de referir sintomas**, **indique qual a sua intensidade** **e a sua frequência** **anual**, de acordo com as escalas que se seguem, assinalando um círculo à volta do número correspondente:

**Intensidade do desconforto/dor**: **1**-Ligeiro **2**-Moderado **3**-Intenso **4**-Muito intenso

Ex.: Intensidade: Considera os sintomas como intensos – 1 2 3 4

**Frequência** (nº de vezes por ano): **1**- Uma vez **2**- 2 ou 3 vezes **3**- 4 a 6 vezes **4**- Mais de 6 vezes

Ex.:Frequência: Sentiu as queixas 2 ou 3 vezes por ano – 1 2 3 4

| **Para responder por toda(o)s a(o)s Enfermeira(o)s** | | **Se respondeu “SIM” passe às seguintes questões:** | | |
| --- | --- | --- | --- | --- |
| **Teve algum problema durante os últimos 12 meses** (fadiga, desconforto, dor, edema), **que estivesse presente pelo menos 4 dias seguidos?** Se sim, **refira qual a sua intensidade e frequência**, assinalando-as com um círculo (ver exemplos apresentados em cima). | | **Os sintomas referidos estão presentes (ou estiveram presentes) durante os últimos 7 dias**? | **Nos últimos 12 meses**, esteve impedido de realizar o seu trabalho normal devido a esse problema? | |
| **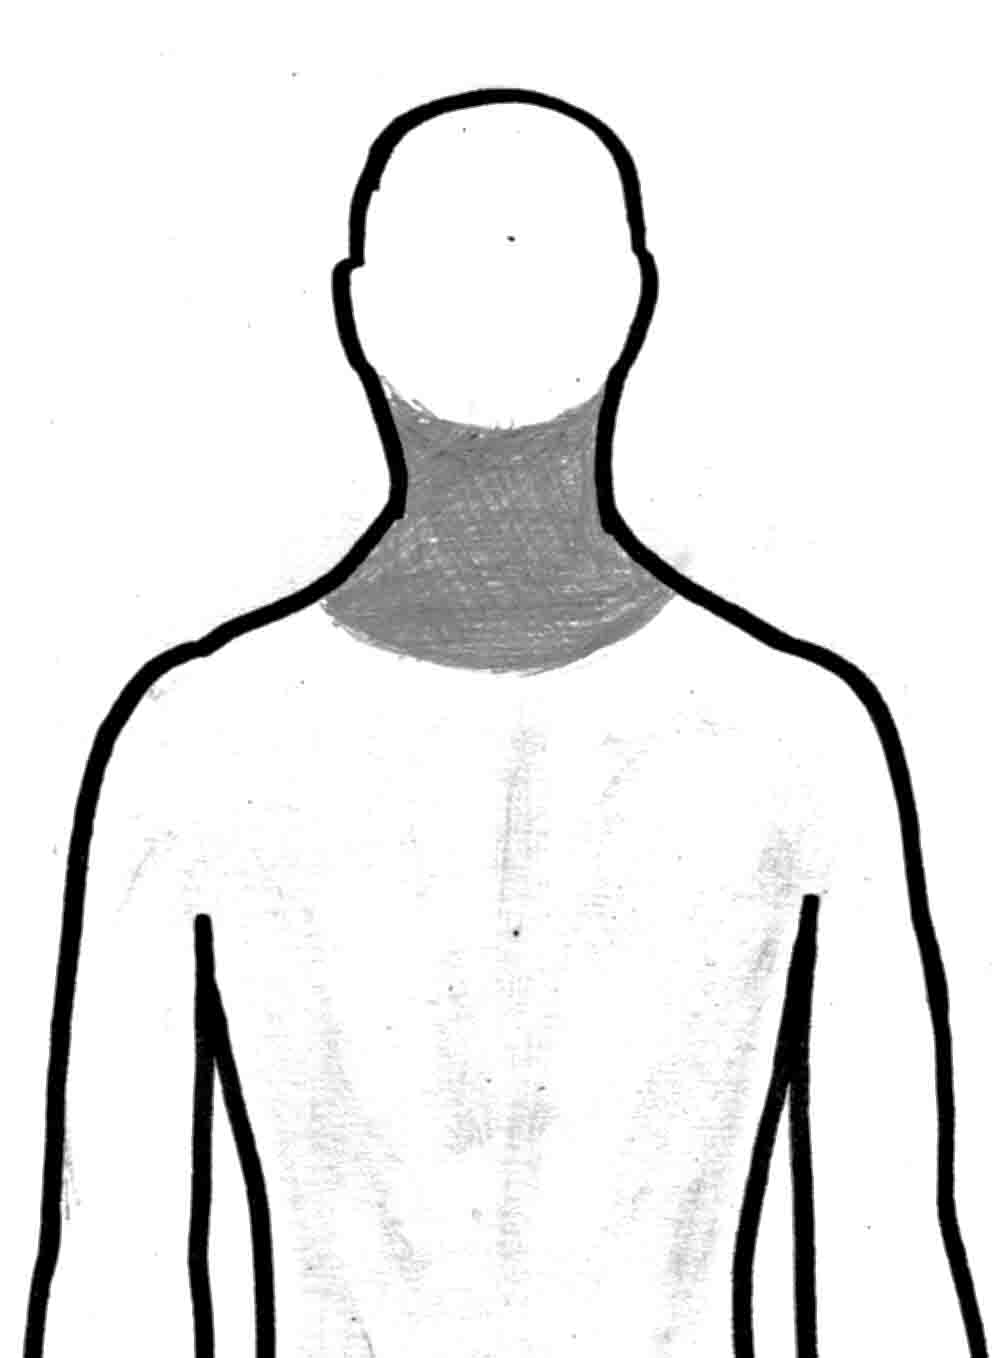PESCOÇO** | 1 **-** NÃO **** | 2 **-** NÃO **** | | 3 **-** NÃO **** |
| 4 **-** SIM ****  Intensidade: 1 2 3 4  Frequência: 1 2 3 4  | 5 **-** SIM **** | | 6 **-** SIM ****  Quantos dias? _____ |
|  | | | | |
| 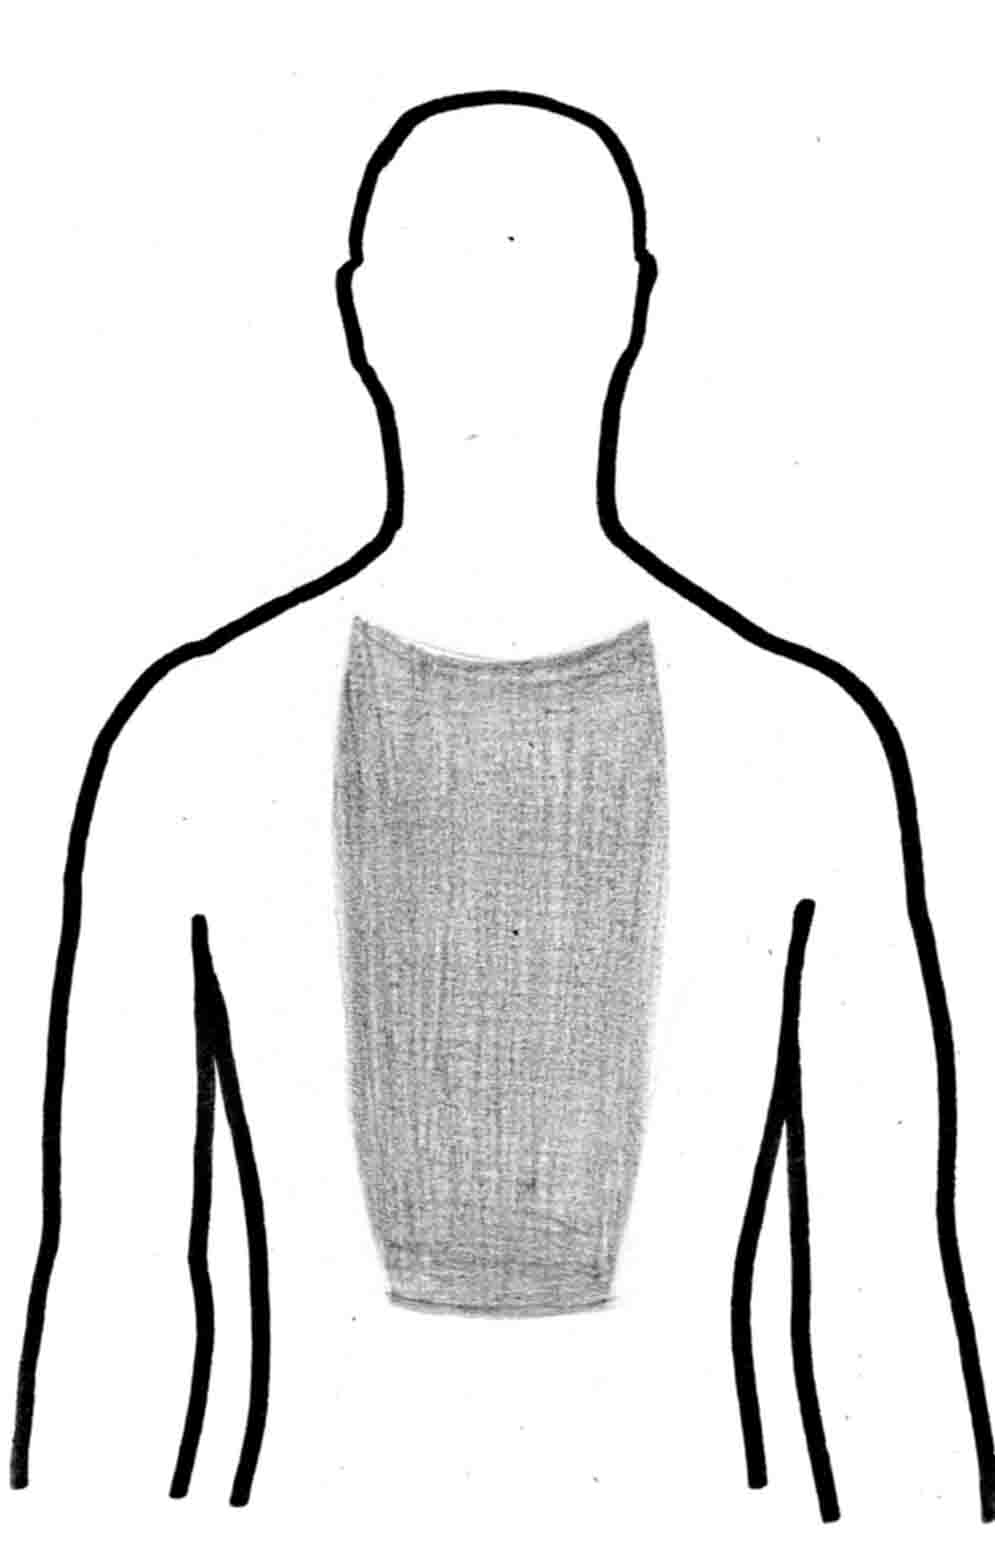 **ZONA DORSAL** | 7 **-** NÃO **** | 8 **-** NÃO **** | | 9 **-** NÃO **** |
| 10 **-** SIM ****  Intensidade: 1 2 3 4  Frequência: 1 2 3 4  | 11 **-** SIM**** | | 12 **-** SIM ****  Quantos dias? _____ |
|  | | | | |
| **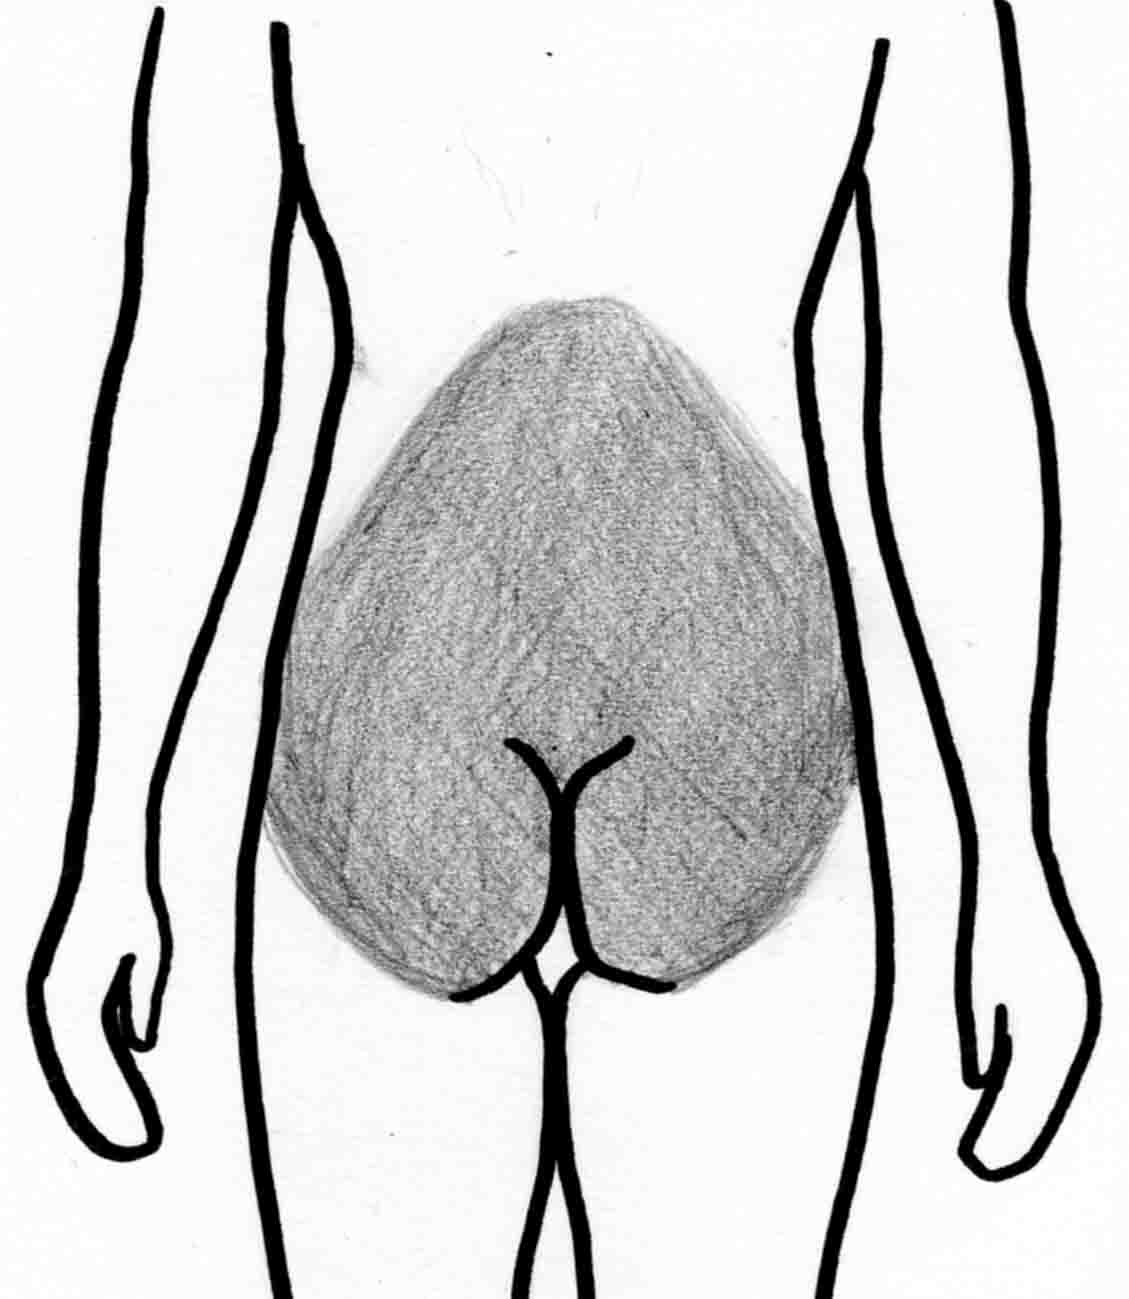ZONA LOMBAR** | 13 **-** NÃO **** | 14 **-** NÃO **** | | 15 **-** NÃO **** |
| 16 **-** SIM ****  Intensidade: 1 2 3 4  Frequência: 1 2 3 4  | 17 **-** SIM **** | | 18 **-** SIM ****  Quantos dias? _____ |
|  | | | | |
| **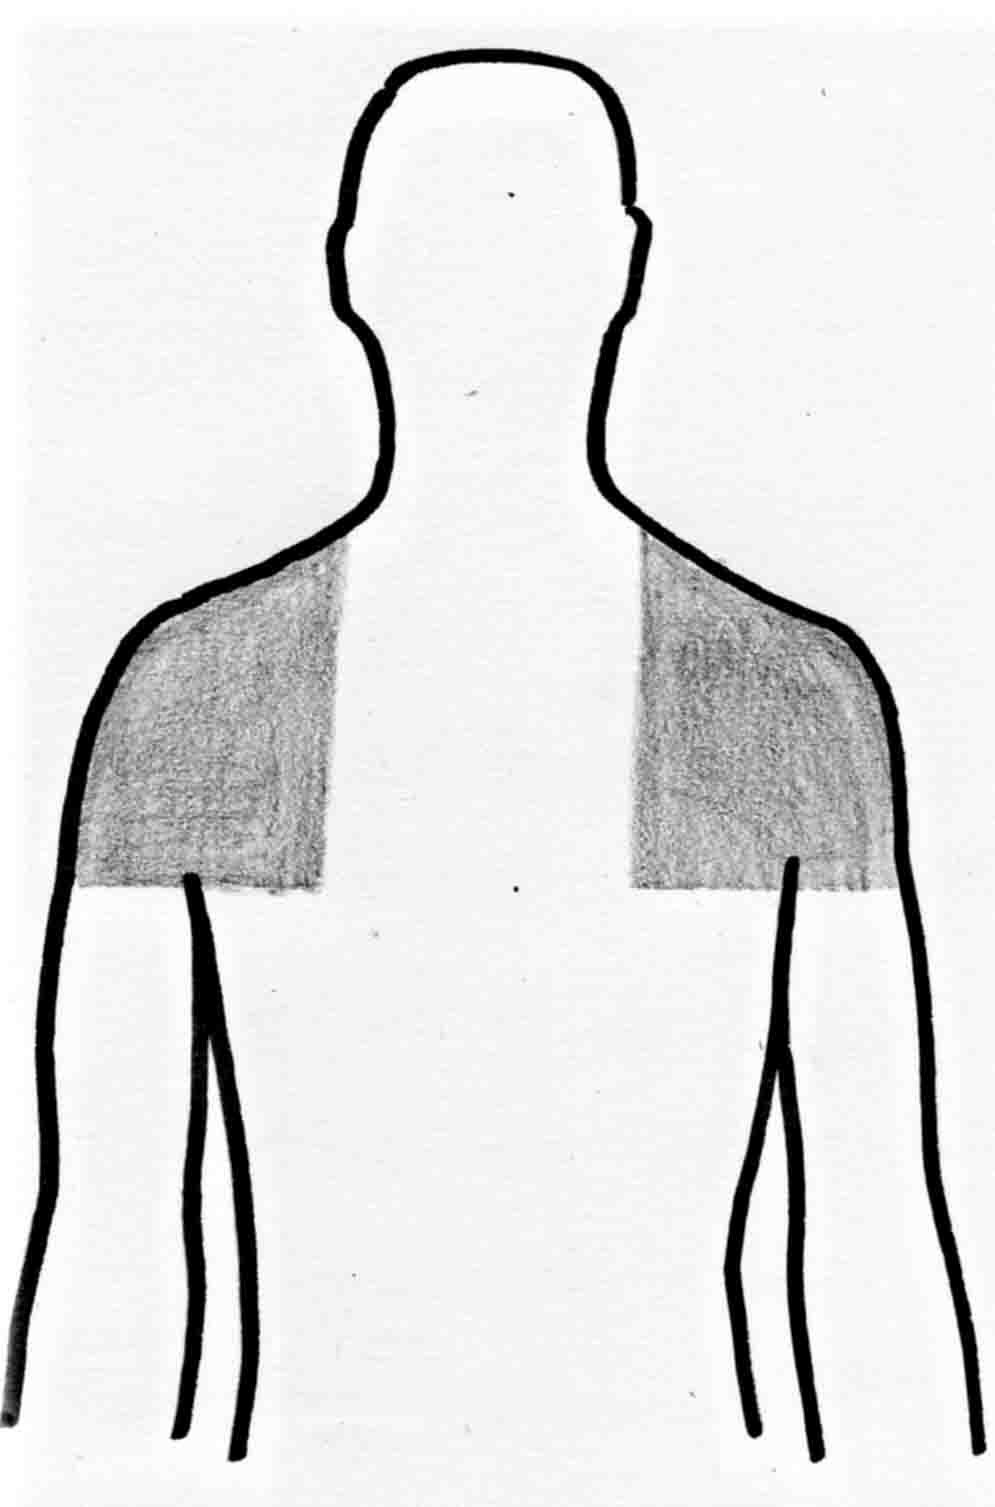OMBRO** | 19 **-** NÃO **** | 20 **-** NÃO **** | | 21 **-** NÃO **** |
| 22 **-** SIM, **direito** ****  Intensidade: 1 2 3 4  Frequência: 1 2 3 4 | 24 **-** SIM **** | | 25 **-** SIM ****  Quantos dias? _____ |
| 23 **-**SIM, **esquerdo** ****  Intensidade: 1 2 3 4  Frequência: 1 2 3 4 |

| **Para responder por toda(o)s a(o)s Enfermeira(o)s** | | **Se respondeu “SIM” passe às seguintes questões:** | | |
| --- | --- | --- | --- | --- |
| **Teve algum problema durante os últimos 12 meses** (fadiga, desconforto, dor, edema), **que estivesse presente pelo menos 4 dias seguidos?** Se sim, **refira qual a sua intensidade**, assinalando-a com um círculo (ver exemplo apresentado no cimo do questionário). | | **Os sintomas referidos estão presentes (ou estiveram presentes) pelo menos 4 dias** **durante os últimos 7 dias**? | **Nos últimos 12 meses**, esteve impedido de realizar o seu trabalho normal devido a esse problema? | |
| **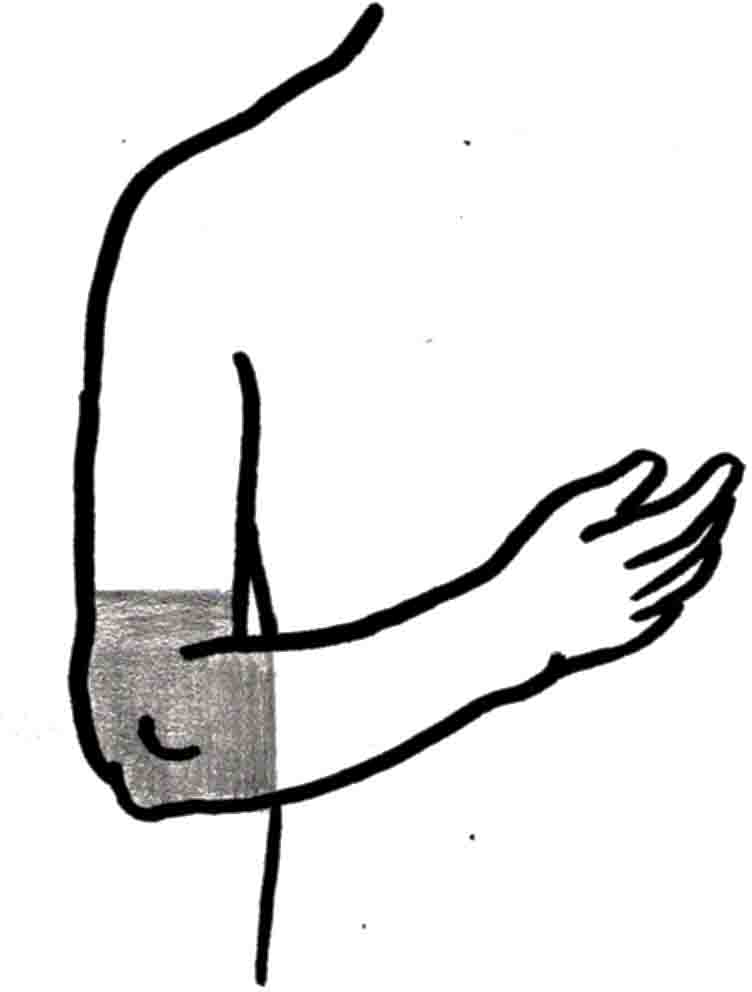COTOVELO** | 26 **-** NÃO **** | 27 **-** NÃO **** | | 28 **-** NÃO **** |
| 29 **-**SIM, **direito** ****  Intensidade: 1 2 3 4  Frequência: 1 2 3 4 | 31 **-** SIM **** | | 32 **-** SIM ****  Quantos dias? _____ |
| 30 **-**SIM, **esquerdo** ****  Intensidade: 1 2 3 4  Frequência: 1 2 3 4 |
|  | | | | |
| **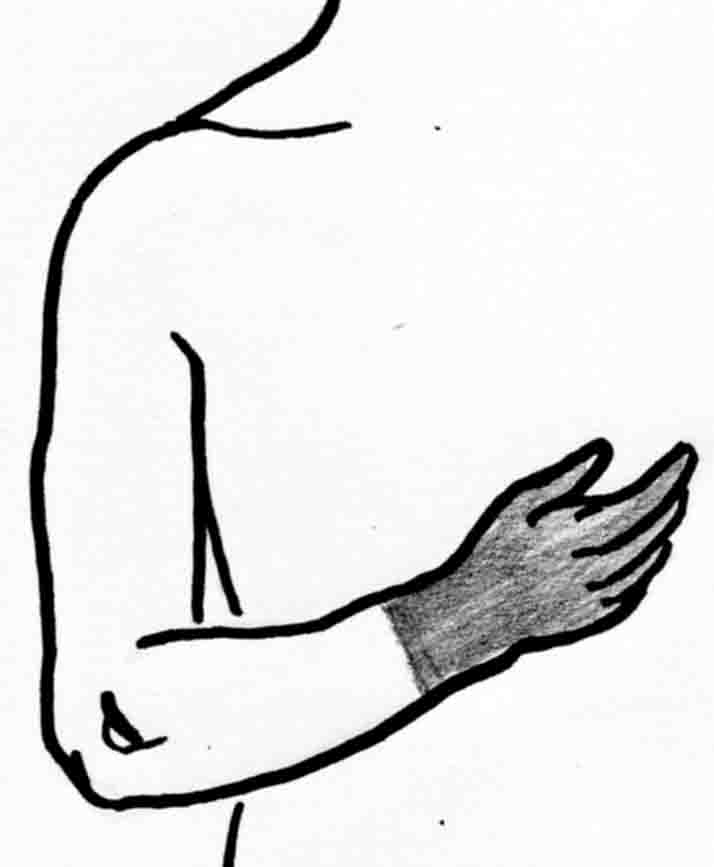PUNHO/MÃO** | 33 **-** NÃO **** | 34 **-** NÃO **** | | 35 **-** NÃO **** |
| 36 **-**SIM, **direito** ****  Intensidade: 1 2 3 4  Frequência: 1 2 3 4 | 38 **-** SIM **** | | 39 **-** SIM ****  Quantos dias? _____ |
| 37 **-**SIM, **esquerdo** ****  Intensidade: 1 2 3 4  Frequência: 1 2 3 4 |
|  | | | | |
| **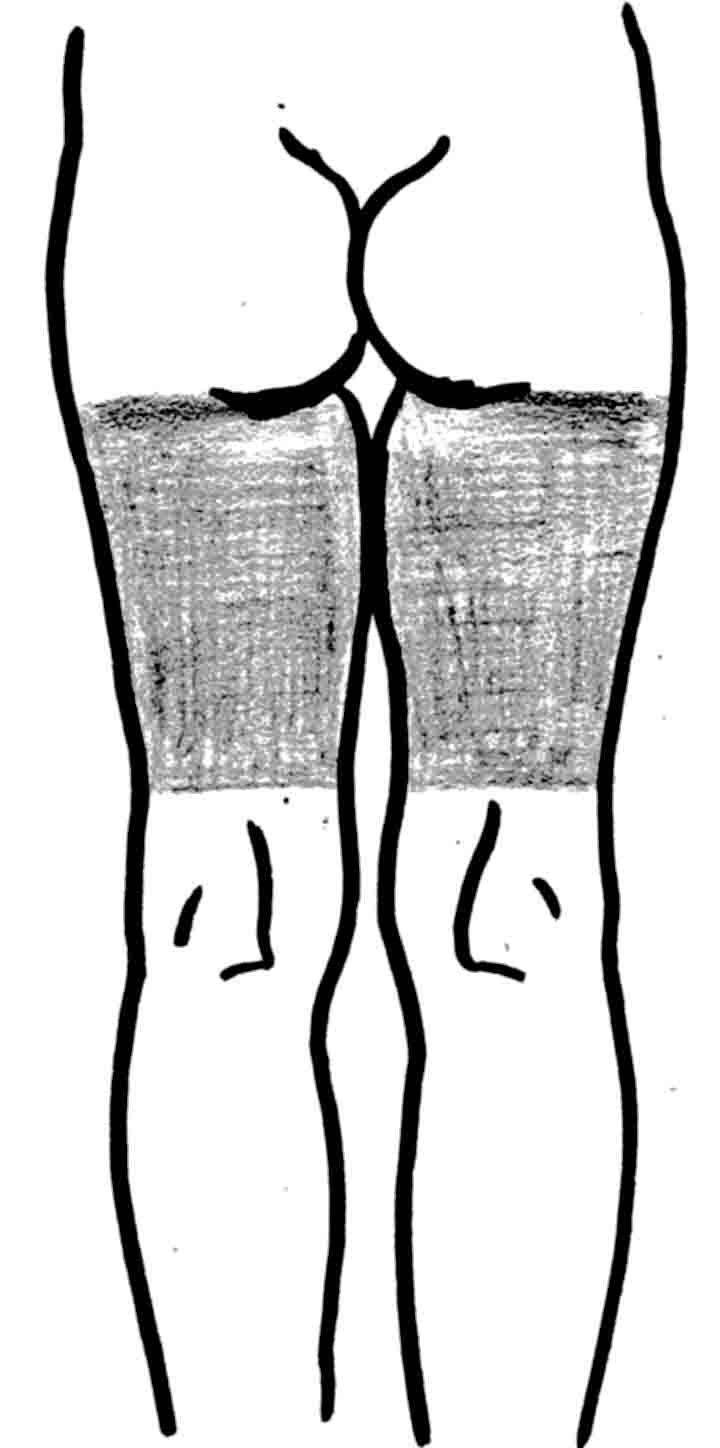COXA** | 40 **-** NÃO **** | 41 **-** NÃO **** | | 42 **-** NÃO **** |
| 43 **-**SIM, **direita** ****  Intensidade: 1 2 3 4  Frequência: 1 2 3 4 | 45 **-** SIM **** | | 46 **-** SIM ****  Quantos dias? _____ |
| 44 **-**SIM, **esquerda** ****  Intensidade: 1 2 3 4  Frequência: 1 2 3 4 |
|  | | | | |
| **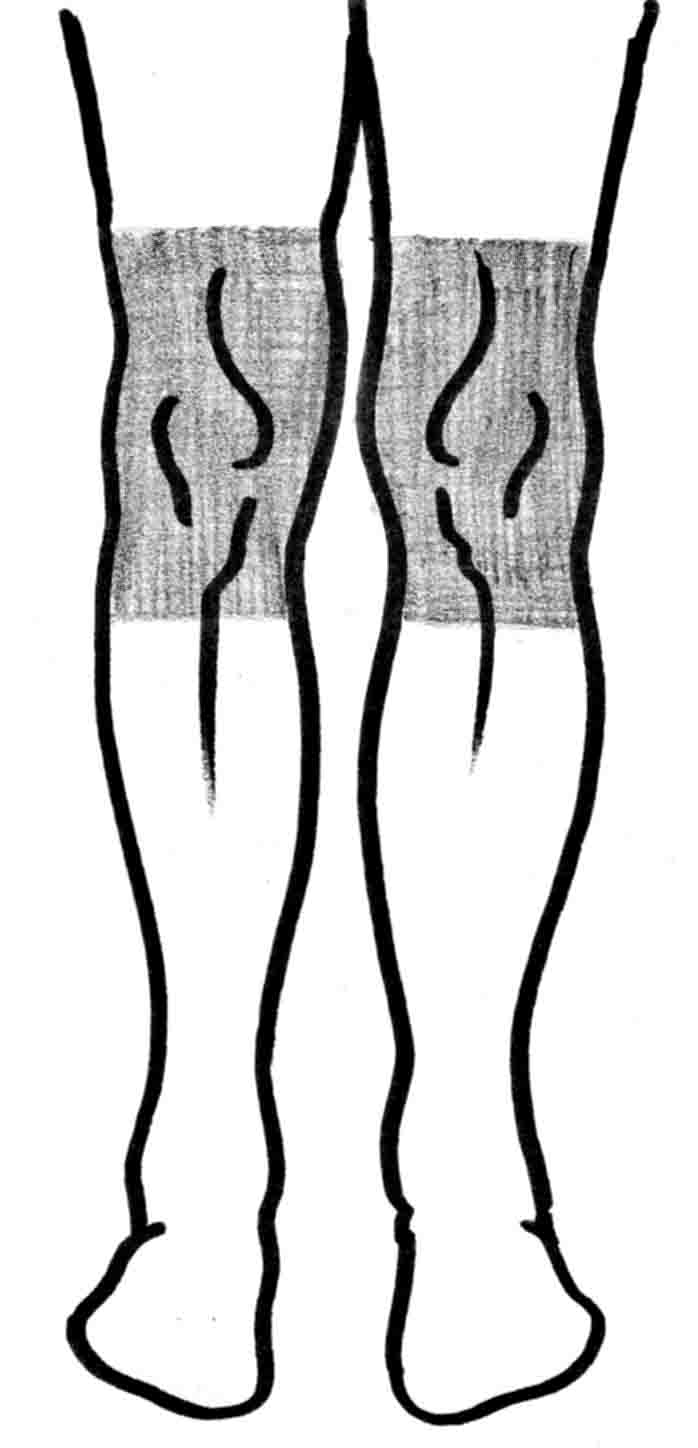JOELHO** | 47 **-** NÃO **** | 48 **-** NÃO **** | | 49 **-** NÃO **** |
| 50 **-**SIM, **direito** ****  Intensidade: 1 2 3 4  Frequência: 1 2 3 4 | 52 **-** SIM **** | | 53 **-** SIM ****  Quantos dias? _____ |
| 51 **-**SIM, **esquerdo** ****  Intensidade: 1 2 3 4  Frequência: 1 2 3 4 |
|  | | | | |
| **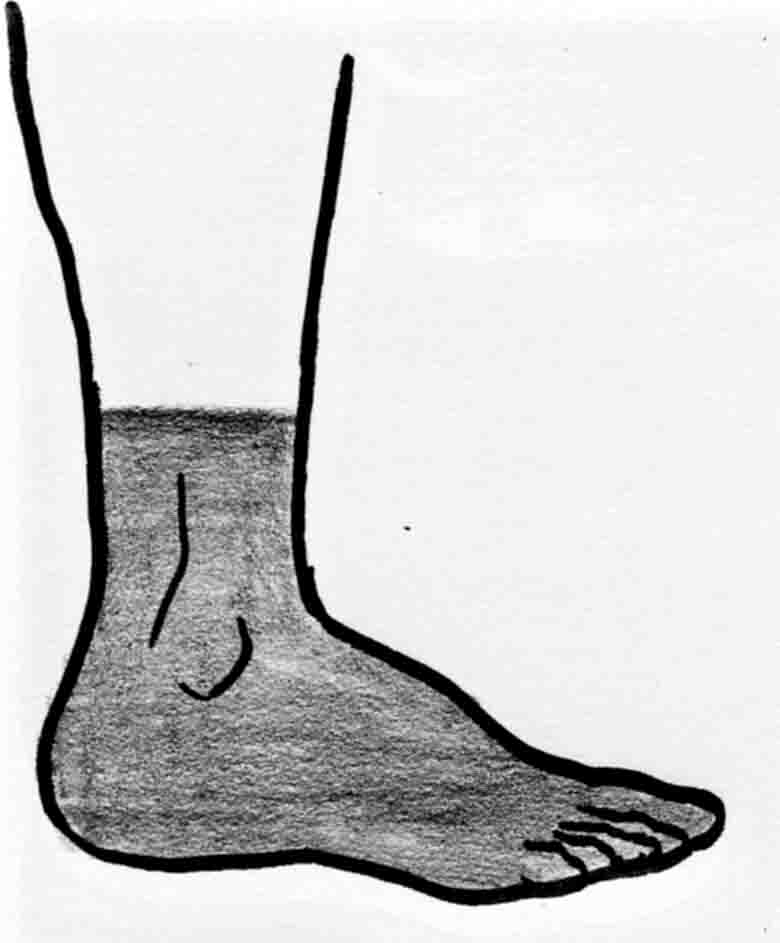**  **TORNOZELO / PÉ** | 54 **-** NÃO **** | 55 **-** NÃO **** | | 56 **-** NÃO **** |
| 57 **-**SIM, **direito** ****  Intensidade: 1 2 3 4  Frequência: 1 2 3 4 | 59 **-** SIM **** | | 60 **-** SIM ****  Quantos dias? _____ |
| 58 **-**SIM, **esquerdo** ****  Intensidade: 1 2 3 4  Frequência: 1 2 3 4 |

**C – Caracterização da actividade de trabalho e relação com os sintomas**

**1 –** Classifique as actividades descritas de acordo com a sua frequência durante um dia de trabalho, utilizando a seguinte chave:

A**ssinale com um círculo o número da sua escolha, em função da seguinte chave:**

**1** – 0 – 1 vez por dia **8** – Não sabe

**2**  – 2 a 5 vezes por dia **9** – Não SE APLICA

**3** – 6 a 10 vezes por dia

**4** – mais de 10 vezes por dia

a) Trabalho informatizado 1 2 3 4 8 9

b) Proc. invasivos (entubação,algaliação,punções) 1 2 3 4 8 9

c) Tratamento de feridas 1 2 3 4 8 9

d) Administração de medicação 1 2 3 4 8 9

e) Avaliação tensão arterial / glicemia / outros 1 2 3 4 8 9

f) Apoio domiciliário 1 2 3 4 8 9

g) Cuidados de higiene e conforto na cama 1 2 3 4 8 9

h) Posicionamento/Mobilização do doente na cama 1 2 3 4 8 9

i) Transferência ou transporte de doentes 1 2 3 4 8 9

j) Levante de doente da cama sem ajuda mecânica 1 2 3 4 8 9

k) Levante doente da cama com ajuda mecânica 1 2 3 4 8 9

l) Alimentação dos doentes 1 2 3 4 8 9

m) Fazer as Camas 1 2 3 4 8 9

n) Cuidados de higiene e conforto no WC 1 2 3 4 8 9

o) Outra. Qual? ___________________________ 1 2 3 4 8 9

**2 –** Classifique as componentes da actividade de acordo com a relação existente com os sintomas, utilizando a seguinte chave (pode referir vários elementos):

A**ssinale com um círculo o número da sua escolha, em função da seguinte chave:**

**1** – Sem Relação com os Sintomas **8** – Não sabe

**2**  – Pouco Relacionado com os Sintomas Referidos **9** – Não se aplica

**3** – Muito relacionado Com os Sintomas

**4** – Totalmente Relacionado com os Sintomas

a) Trabalho Sentado 1 2 3 4 8 9

b) Trabalho de Pé 1 2 3 4 8 9

c) Braços acima da altura dos ombros 1 2 3 4 8 9

d) Inclinar o tronco 1 2 3 4 8 9

e) Rodar o tronco 1 2 3 4 8 9

f) Repetitividade dos braços 1 2 3 4 8 9

g) Repetitividade das Mãos/Dedos 1 2 3 4 8 9

h) Precisão com os dedos 1 2 3 4 8 9

i) Aplicar força com as mãos ou dedos 1 2 3 4 8 9

j) Manipular cargas entre 1 – 4 kg 1 2 3 4 8 9

k) Manipular cargas superiores a 4 kg 1 2 3 4 8 9

l) Levantar e deslocar cargas entre 10 – 20 kg 1 2 3 4 8 9

m) Levantar e deslocar cargas sup. a 20 kg 1 2 3 4 8 9

n) Outra. Qual? ___________________________ 1 2 3 4 8 9

2 – Em média quantas pausas tem ao longo do turno de trabalho? _______ (nº de pausas);

3– Que actividade de trabalho considera mais difícil? (lista da pergunta 1 ao click)

3.1 – Porquê? ________________________________________________________

**D – Caracterização do estado de saúde**

1. Realiza regularmente algum tipo de actividade física? NÃO SIM

1.1 Se Sim, qual? __________________________

2. Fuma? NÃO SIM 13.1. Nº de cigarros/outro _____/dia

3. Bebe habitualmente bebidas alcoólicas? NÃO SIM

4. Bebe habitualmente café? NÃO SIM

5. Sofre de alguma doença? NÃO SIM

5.1. Se sim, qual?

Diabetes Hipertensão Gota Osteoporose Artrose

Hérnia discal Síndrome do túnel cárpico Tendinite

5.2. Outra: ______________________________________________________________

6. Toma medicamentos regularmente (incluindo calmantes ou a pílula)?

NÃO SIM

7. Está a fazer algum tratamento de reabilitação? (ex.: Fisioterapia, Terapia Ocupacional,…) NÃO SIM

7.1. Se sim, qual?_______________________________________

8. Consulta o seu médico:

8.1 Periodicamente Esporadicamente Em serviços públicos Privados

9. Consultou algum médico no último ano? NÃO SIM porquê?____________

_____________________________________________________________________

**MUITO OBRIGADO pela sua colaboração!**
